CORRECTION

# Correction: Maternal Separation Impairs Cocaine-Induced Behavioural Sensitization in Adolescent Mice

The *PLOS ONE* Staff

## Notice of republication

This article was republished on March 6, 2017, to correct an error in the author order that was introduced during the typesetting process. The publisher apologizes for the error. Please download this article again to view the correct version. The originally published, uncorrected article and the republished, corrected article are provided here for reference.

## Supporting information

**S1 File. Originally published, uncorrected article.**

(PDF)

**S2 File. Republished, corrected article.**

(PDF)

## Reference

1. Gracia-Rubio I, Martinez-Laorden E, Moscoso-Castro M, Milanés MV, Laorden ML, Valverde O (2016) Maternal Separation Impairs Cocaine-Induced Behavioural Sensitization in Adolescent Mice. *PLoS ONE* 11(12): e0167483. doi:[10.1371/journal.pone.0167483](https://doi.org/10.1371/journal.pone.0167483) PMID: [27936186](https://pubmed.ncbi.nlm.nih.gov/27936186/)

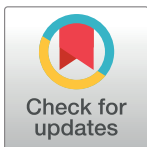

## OPEN ACCESS

**Citation:** The *PLOS ONE* Staff (2017) Correction: Maternal Separation Impairs Cocaine-Induced Behavioural Sensitization in Adolescent Mice. *PLoS ONE* 12(4): e0176788. <https://doi.org/10.1371/journal.pone.0176788>

**Published:** April 25, 2017

**Copyright:** © 2017 The PLOS ONE Staff. This is an open access article distributed under the terms of the [Creative Commons Attribution License](https://creativecommons.org/licenses/by/4.0/), which permits unrestricted use, distribution, and reproduction in any medium, provided the original author and source are credited.
